# Supplementary material
Source: Royal Society of Chemistry journal article supplement (doi:10.1039/d5py01145k)
Supplement: d5py01145k1.pdf [file d5py01145k1.pdf]

## 1. Composition of SRB culture medium

### Solution A:

|                                      |     |    |
|--------------------------------------|-----|----|
| K <sub>2</sub> HPO <sub>4</sub>      | 0.5 | g  |
| NH <sub>4</sub> Cl                   | 1.0 | g  |
| Na <sub>2</sub> SO <sub>4</sub>      | 1.0 | g  |
| CaCl <sub>2</sub> •2H <sub>2</sub> O | 0.1 | g  |
| MgSO <sub>4</sub> •7H <sub>2</sub> O | 2.0 | g  |
| DL- Sodium lactate                   | 2.0 | g  |
| yeast extract                        | 1.0 | g  |
| Resazurin                            | 1.0 | mg |
| H <sub>2</sub> O                     | 980 | ml |

### Solution B

|                                      |      |    |
|--------------------------------------|------|----|
| FeSO <sub>4</sub> •7H <sub>2</sub> O | 0.5  | g  |
| H <sub>2</sub> O                     | 10.0 | ml |

### Solution C

|                      |      |    |
|----------------------|------|----|
| Sodium thioglycolate | 0.1  | g  |
| Vitamin C            | 0.1  | g  |
| H <sub>2</sub> O     | 10.0 | ml |

## 2. Method for preparing culture medium

Dissolve the various components in the solution with an appropriate amount of water. Solution A was boiled for a few minutes, cooled to room temperature, and anaerobic N<sub>2</sub> gas was introduced. After adding solutions B and C, the pH was adjusted to 7.8 with NaOH, and aliquoted under anaerobic N<sub>2</sub> (shake the medium at any time) into anaerobic tubes. Sterilize at 121 °C for 15 minutes.

## 3. SRB culture equipment and anaerobic inoculation method

### 3.1 Inoculation process

As shown in Fig. S1, before the inoculation of sulfate-reducing bacteria, N<sub>2</sub> was introduced into the SRB medium containing high temperature sterilization for about 15 minutes, and the SRB stock solution was injected with a syringe during the N<sub>2</sub> flow injected into the culture medium. The injection port is sealed with paraffin.

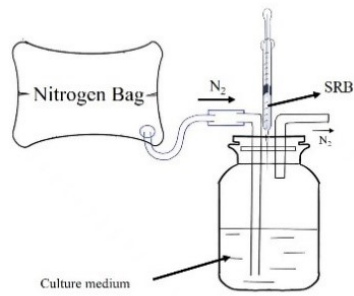

Fig. S1-a Schematic diagram of vaccination

### 3.2 Anaerobic culture process

After inoculation, keep N<sub>2</sub> in low-speed circulation, put a rubber tube with a balloon on the right air outlet, shut down N<sub>2</sub> after the balloon is inflated, and quickly seal the left air inlet with another set of rubber tube with a balloon. At the same time, it was observed that the liquid level in the intake duct was slightly higher than the liquid level in the jar.

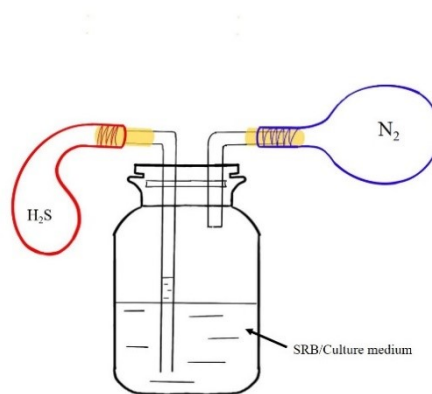

Fig. S1-b SRB Cultivation process
